# Supplementary material for: Attention training for infants at familial risk of ADHD (INTERSTAARS): study protocol for a randomised controlled trial
Source: Springer Nature journal article supplement (doi:10.1186/s13063-016-1727-0), 2016-12-01
Supplement: MOESM1 [file 11963566]

**Table 1. Summary of measures**

|                                                  | Measure                                      | 10-14 months<br>Baseline lab<br>visit | 10-14 months<br>Baseline<br>home visit | 12-16 months<br>Inter -<br>mediate<br>home visit | 10-18 months<br>Intervention<br>period | 14- 18 months<br>Outcome home<br>visit | 14-18 months<br>Outcome lab<br>visit | 24 month<br>follow up | 36 month<br>follow up |
|--------------------------------------------------|----------------------------------------------|---------------------------------------|----------------------------------------|--------------------------------------------------|----------------------------------------|----------------------------------------|--------------------------------------|-----------------------|-----------------------|
| <b>Parent<br/>questionnaires/<br/>interviews</b> | Demographic Interview                        | X                                     |                                        |                                                  |                                        |                                        |                                      |                       |                       |
|                                                  | Demographic questionnaire                    | X                                     |                                        |                                                  |                                        |                                        |                                      |                       |                       |
|                                                  | Medical and psychiatric<br>history interview | X                                     |                                        |                                                  |                                        |                                        |                                      |                       |                       |
|                                                  | Medical and psychiatric<br>history interview | X                                     |                                        |                                                  |                                        |                                        |                                      |                       |                       |
|                                                  | Sleep and Settle Questionnaire               | X                                     |                                        |                                                  |                                        |                                        | X                                    |                       |                       |
|                                                  | Visual Media Exposure<br>History             |                                       | X                                      |                                                  |                                        |                                        |                                      |                       |                       |
|                                                  | Sleep Diary                                  |                                       |                                        |                                                  | X                                      |                                        |                                      |                       |                       |
|                                                  | Visual Media Diary                           |                                       |                                        |                                                  | X                                      |                                        |                                      |                       |                       |
|                                                  | Infant Behaviour<br>Questionnaire Revised    | X                                     |                                        | X                                                |                                        |                                        | X                                    |                       |                       |
|                                                  | Vineland Adaptive Behaviour<br>Scales        | X                                     |                                        |                                                  |                                        |                                        | X                                    | X                     | X                     |

|                                  |                                                      |   |   |   |  |  |   |   |   |
|----------------------------------|------------------------------------------------------|---|---|---|--|--|---|---|---|
|                                  | Early Child Behavioural Questionnaire                |   |   |   |  |  |   | X | X |
|                                  | Child Behavioural Checklist Preschool                |   |   |   |  |  |   |   | X |
|                                  | Preschool Diagnostic Interview Schedule for Children |   |   |   |  |  |   |   | X |
|                                  | Behavioural Rating Inventory of Executive Functions  |   |   |   |  |  |   |   | X |
| <b>Observational assessments</b> | Toy Play                                             | X | X | X |  |  | X | X | X |
|                                  | Free Play                                            | X |   |   |  |  |   | X | X |
|                                  | Mullen Scales of Early Learning                      | X |   |   |  |  |   | X | X |
|                                  | Early Social Communication Skills                    |   | X | X |  |  | X |   |   |
| <b>Eye-tracking</b>              | <b>Cognitive control task</b>                        | X | X | X |  |  | X | X |   |
|                                  | <b>Gap-overlap task</b>                              | X | X | X |  |  | X | X |   |
|                                  | Sequence learning task                               | X | X | X |  |  | X | X |   |

|                           |                                 |          |          |          |          |          |
|---------------------------|---------------------------------|----------|----------|----------|----------|----------|
|                           | <b>Sustained attention task</b> | <b>X</b> | <b>X</b> | <b>X</b> | <b>X</b> | <b>X</b> |
|                           | Visual paired comparison task   | X        | X        | X        | X        | X        |
|                           | Distractor task                 | X        | X        | X        | X        | X        |
| <b>Neurophysiological</b> | EEG                             | X        |          |          |          | X        |
|                           | Autonomic control measures      | X        |          |          |          | X        |

\*Measures that contribute to the primary outcome are shown in dark gray and bold font; secondary outcomes shown in light gray.
